# Supplementary material for: 3-(1-Phenyl-4-((2-(4-arylthiazol-2-yl)hydrazono)methyl)-1H-pyrazol-3-yl)-2H-chromen-2-ones: one-pot three component condensation, in vitro antimicrobial, antioxidant and molecular docking studies
Source: Royal Society of Chemistry journal article supplement (doi:10.1039/c5ra04196a), 2015-01-01
Supplement: c5ra04196a1.pdf [file c5ra04196a1.pdf]

## Supporting file

### 3-(1-Phenyl-4-((2-(4-arylthiazol-2-yl)hydrazono)methyl)-1H-pyrazol-3-yl)-2H-chromen-2-ones: One-pot three component condensation, *in vitro* antimicrobial, antioxidant and molecular docking studies

Ramesh Gondru<sup>a</sup>, Janardhan Banothu<sup>a</sup>, Ranjith Kumar Thatipamula<sup>b</sup>, Althaf Hussain SK<sup>c</sup>, Rajitha Bavantula<sup>a,\*</sup>

**Molecular docking studies:** Interaction (H-bonding) between the ligands (**5a-l**) and the amino acids of the receptor are shown in the following figures.

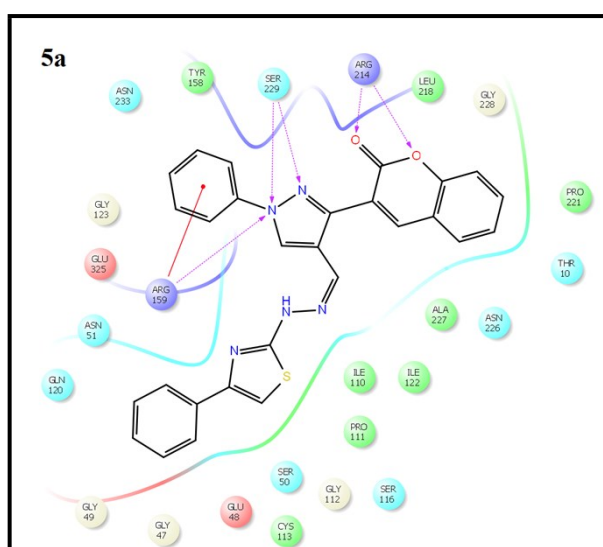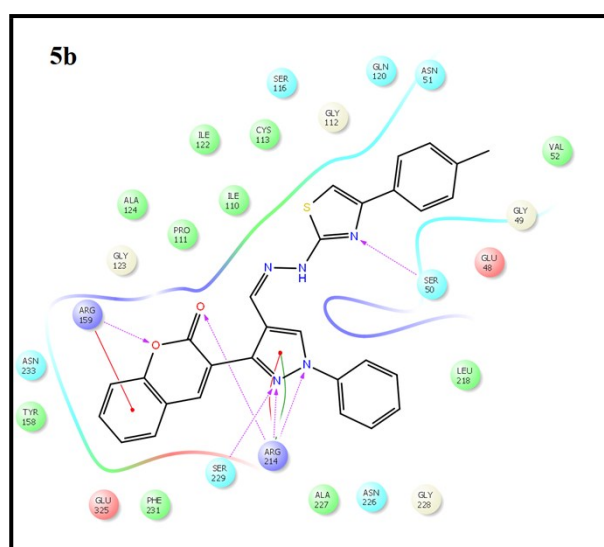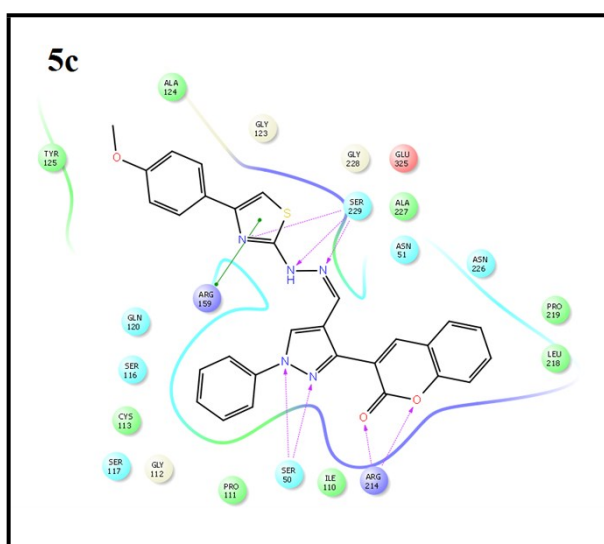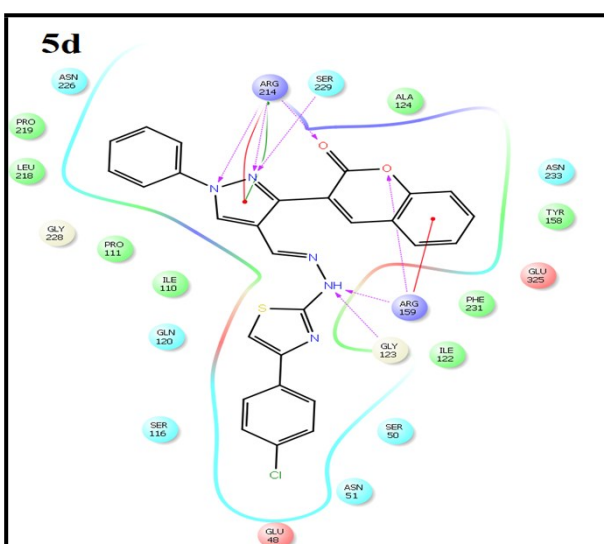

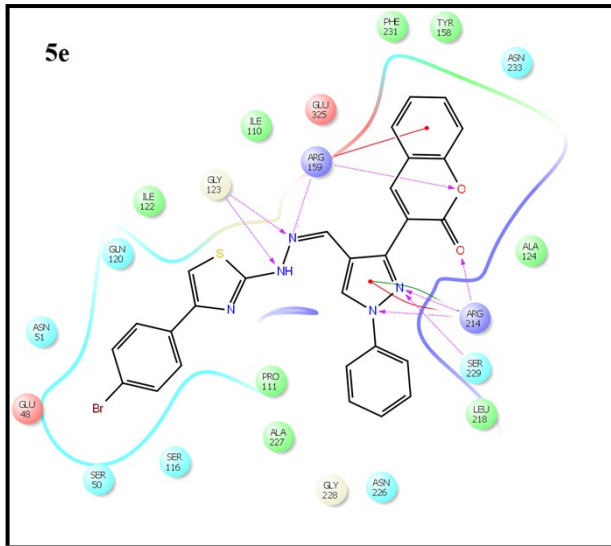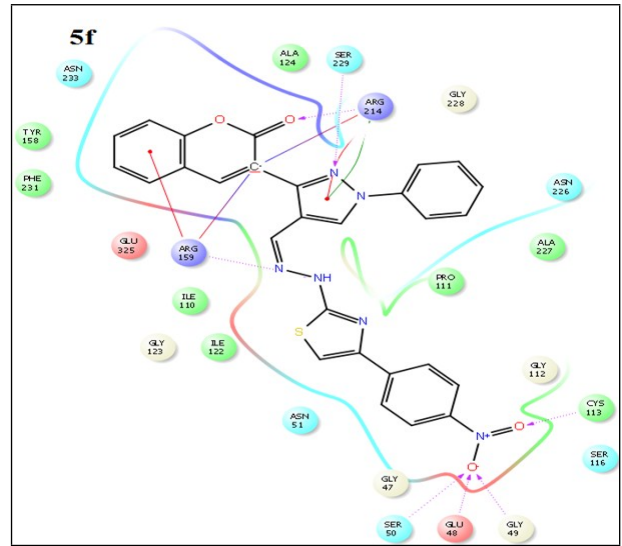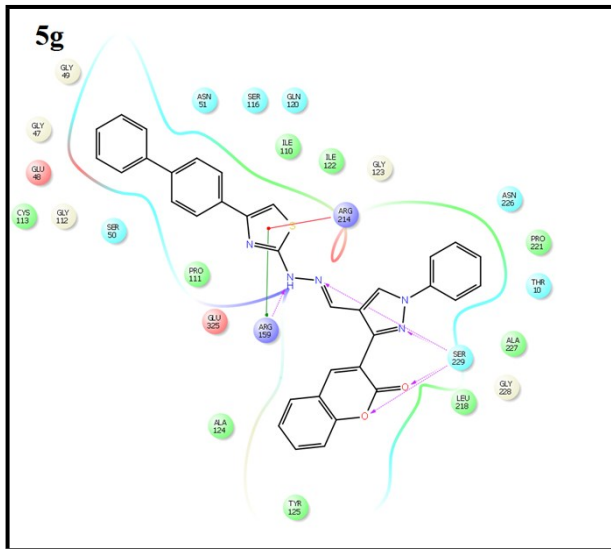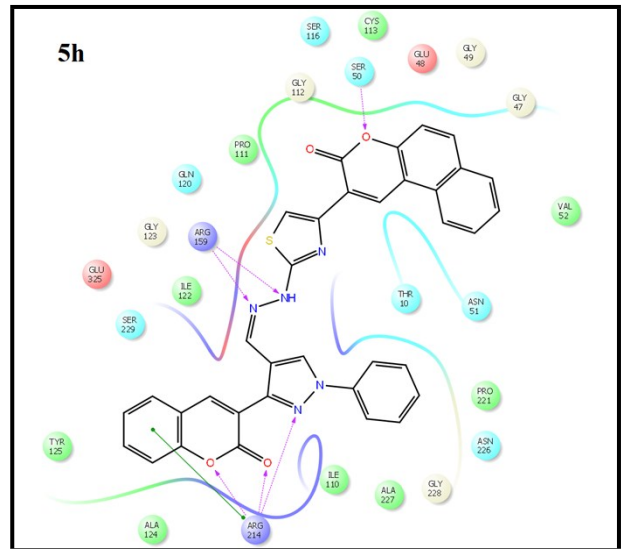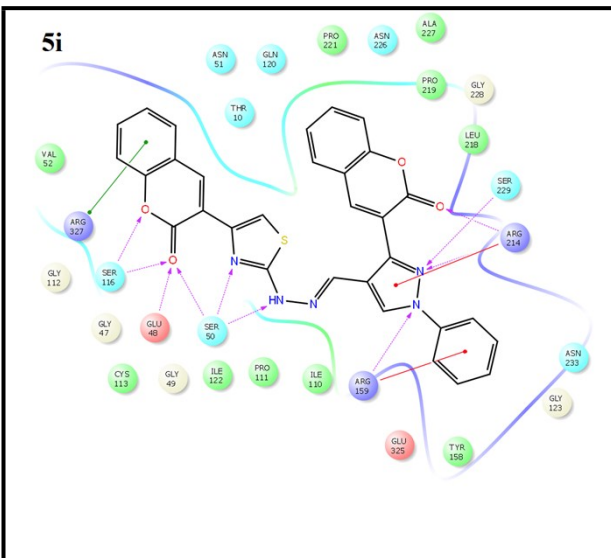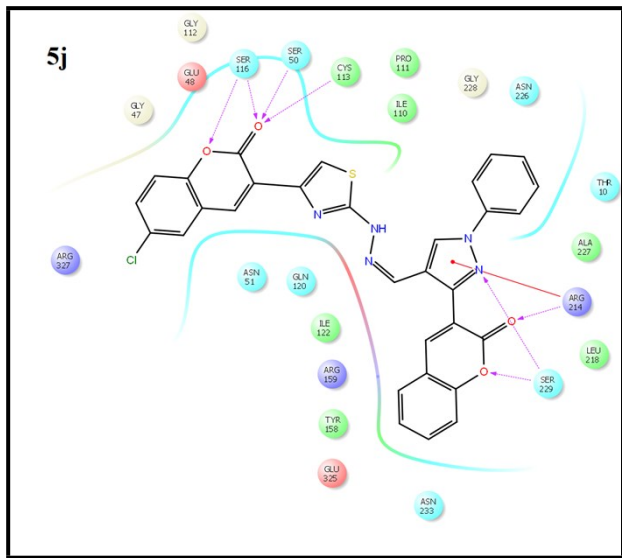

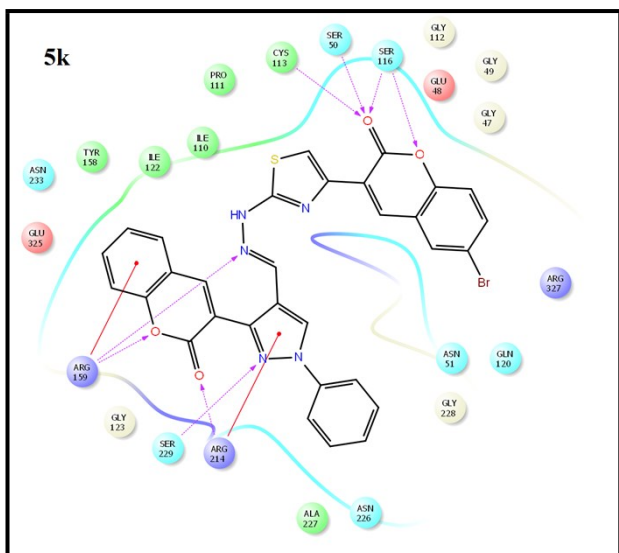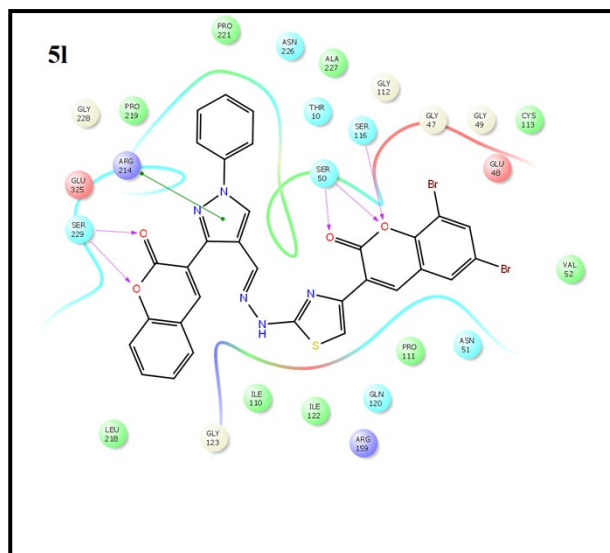

|  |                    |  |                          |  |                     |
|--|--------------------|--|--------------------------|--|---------------------|
|  | Charged (negative) |  | Water                    |  | H-bond (side chain) |
|  | Charged (positive) |  | Hydration site           |  | Metal coordination  |
|  | Polar              |  | Displaced hydration site |  | Salt Bridge         |
|  | Hydrophobic        |  | $\pi$ - $\pi$ stacking   |  | Solvent exposure    |
|  | Glycine            |  | $\pi$ -cation            |  |                     |
|  | Metal              |  | H-bond (backbone)        |  |                     |

## Spectra

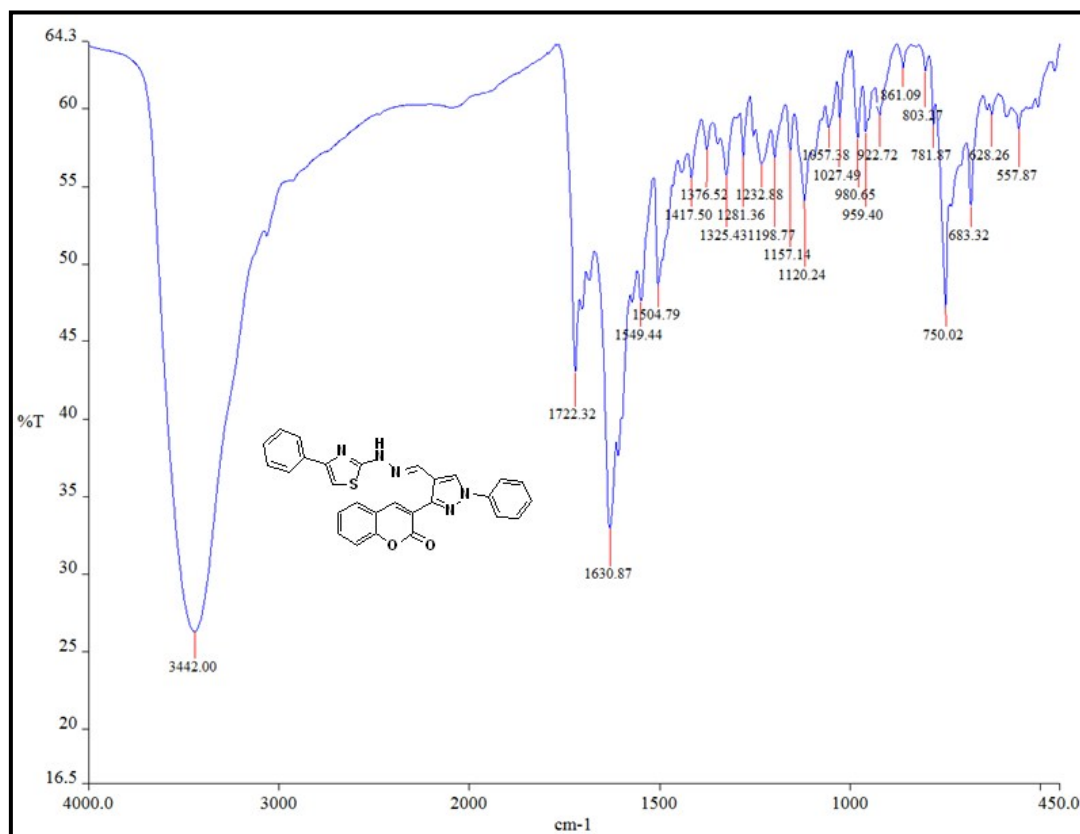

IR (KBr) spectrum of compound 5a

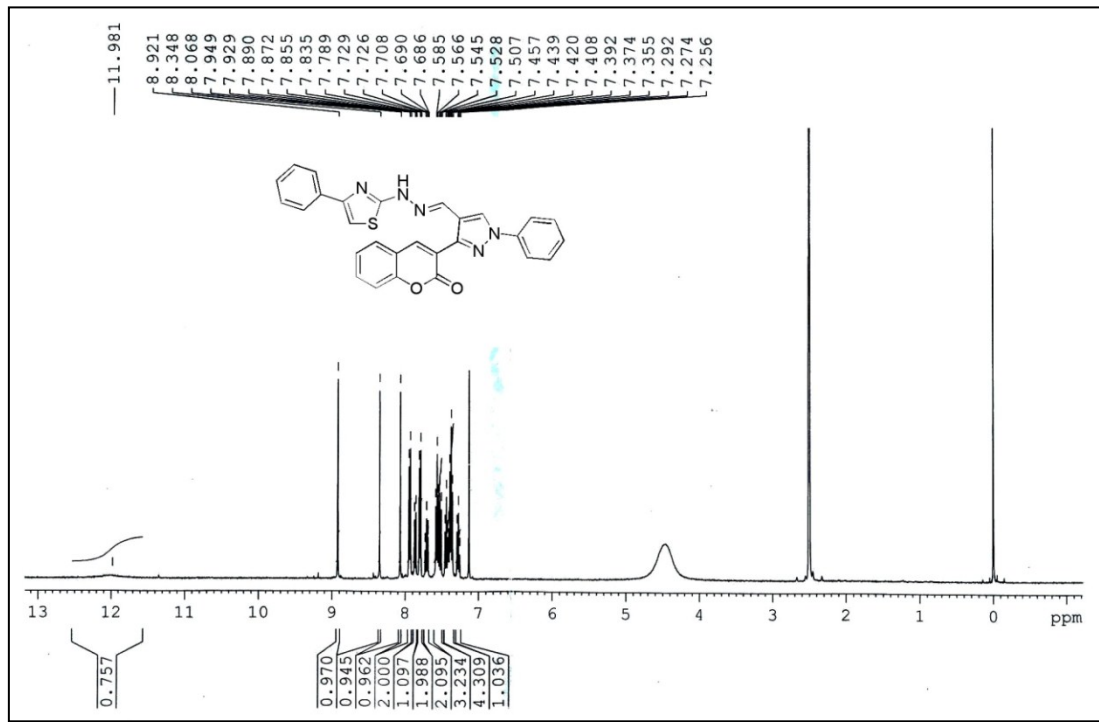

**<sup>1</sup>H NMR (400 MHz, DMSO-*d*<sub>6</sub>) spectrum of compound 5a**

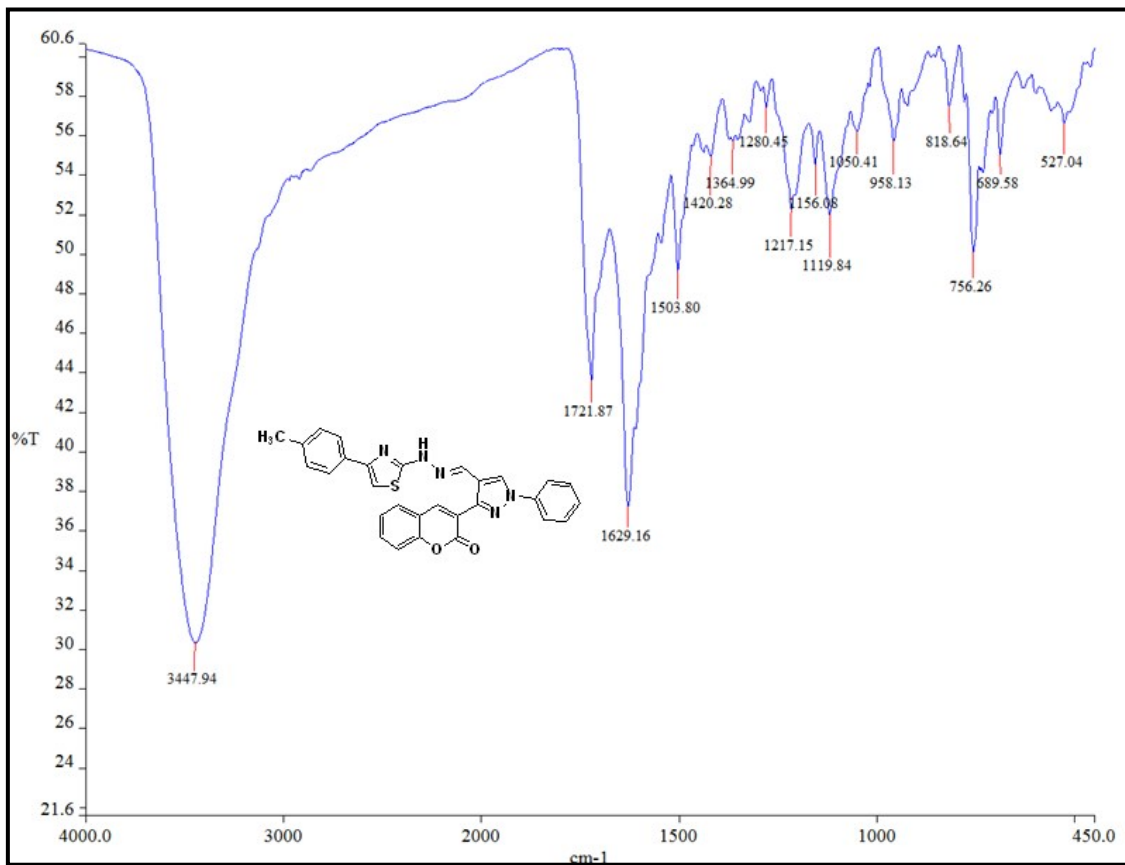

**IR (KBr) spectrum of compound 5b**

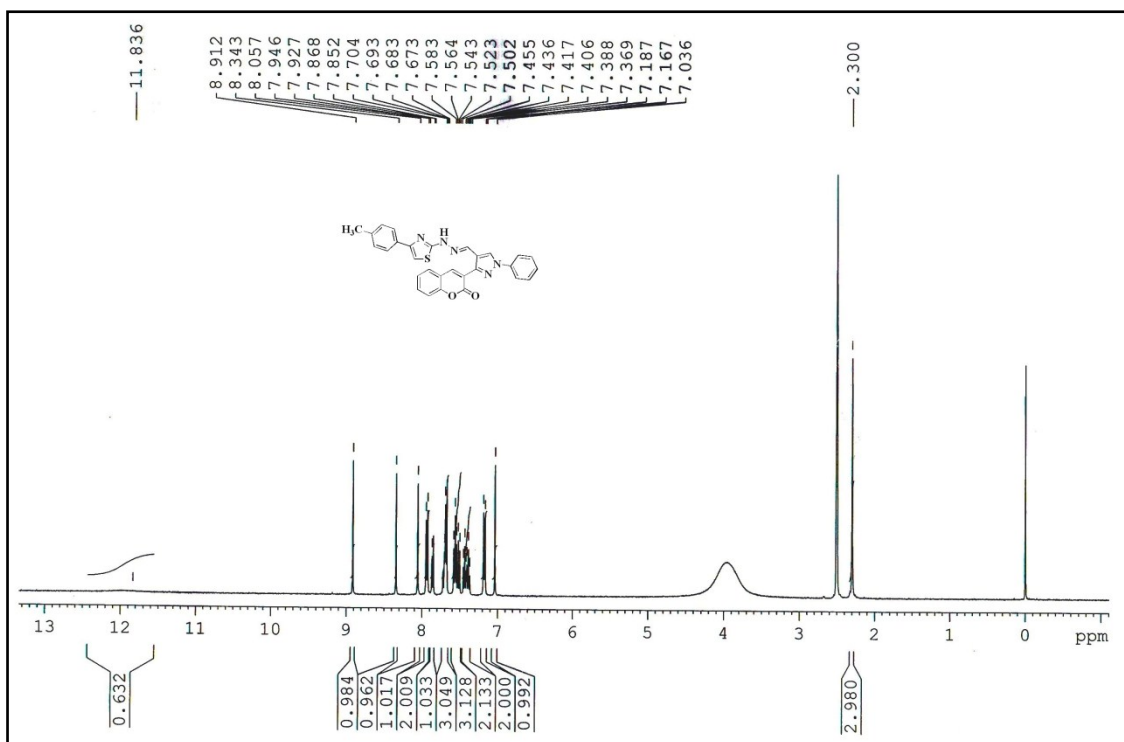

**<sup>1</sup>H NMR (400 MHz, DMSO-*d*<sub>6</sub>) spectrum of compound 5b**

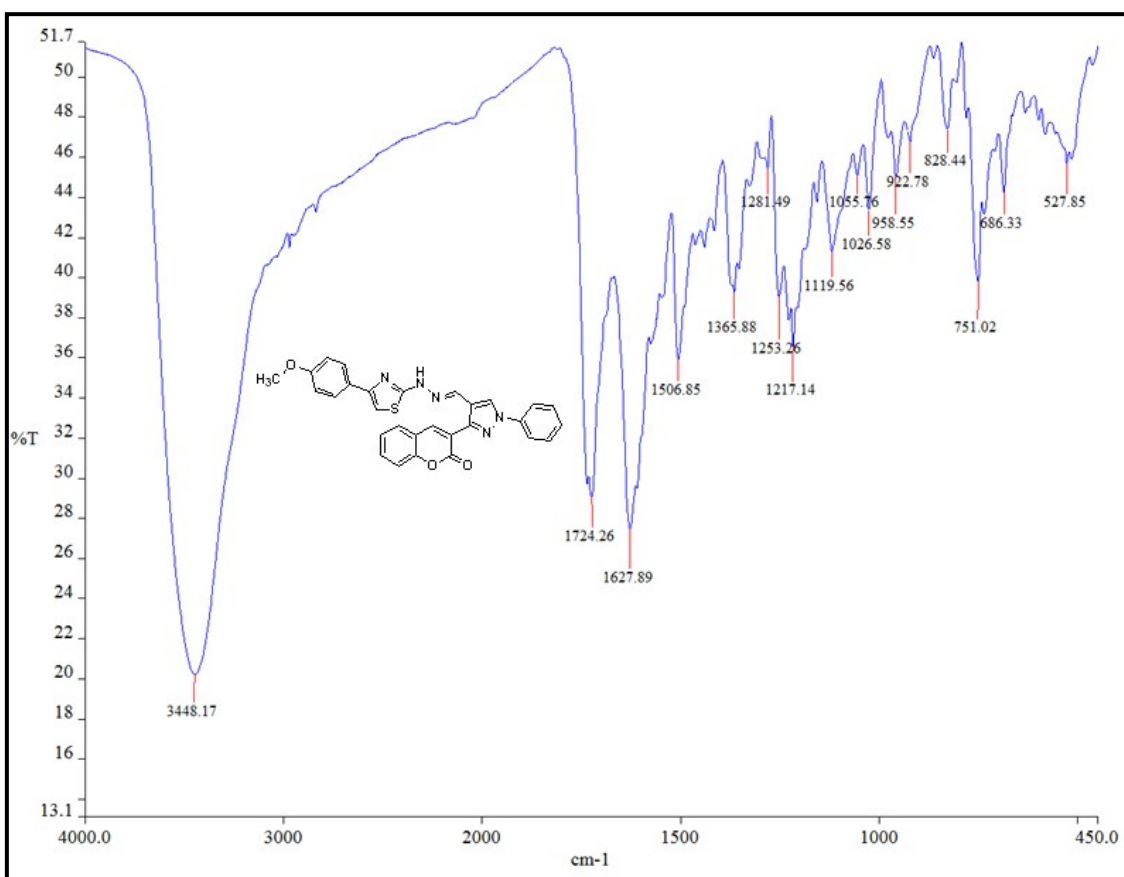

**IR (KBr) spectrum of compound 5c**

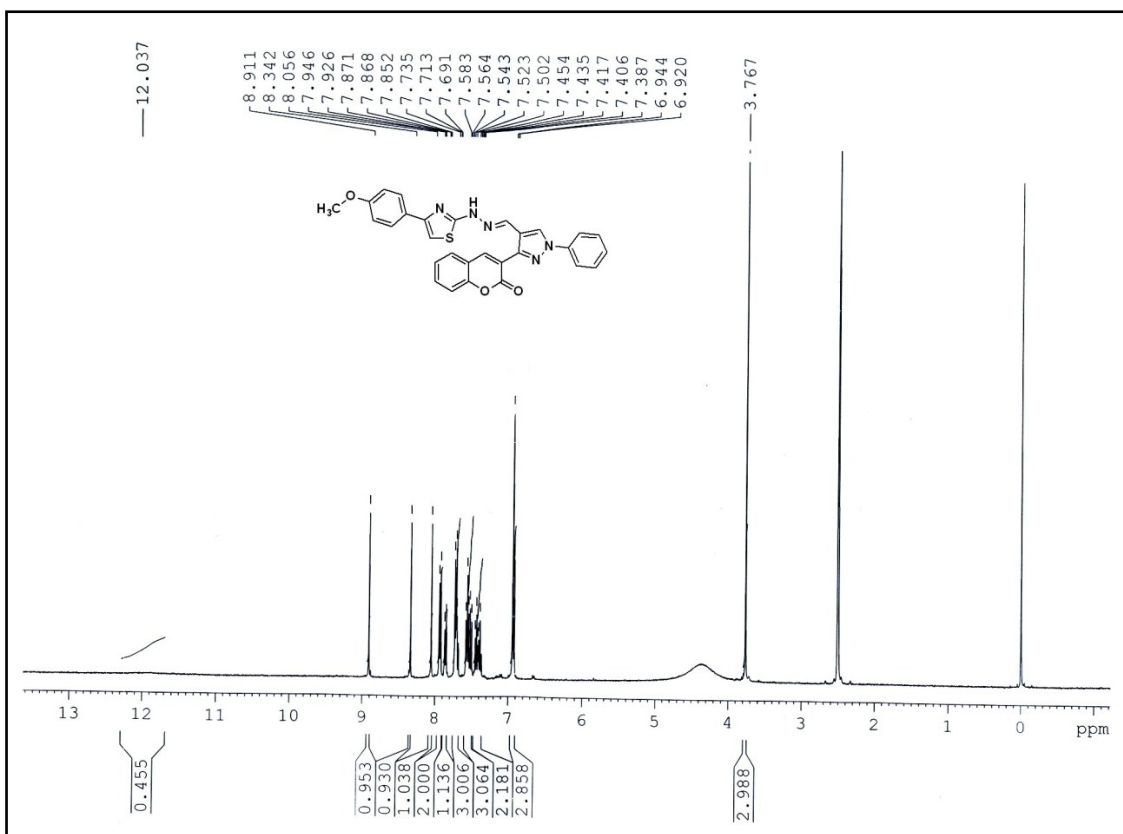

**<sup>1</sup>H NMR (400 MHz, DMSO-*d*<sub>6</sub>) spectrum of compound 5c**

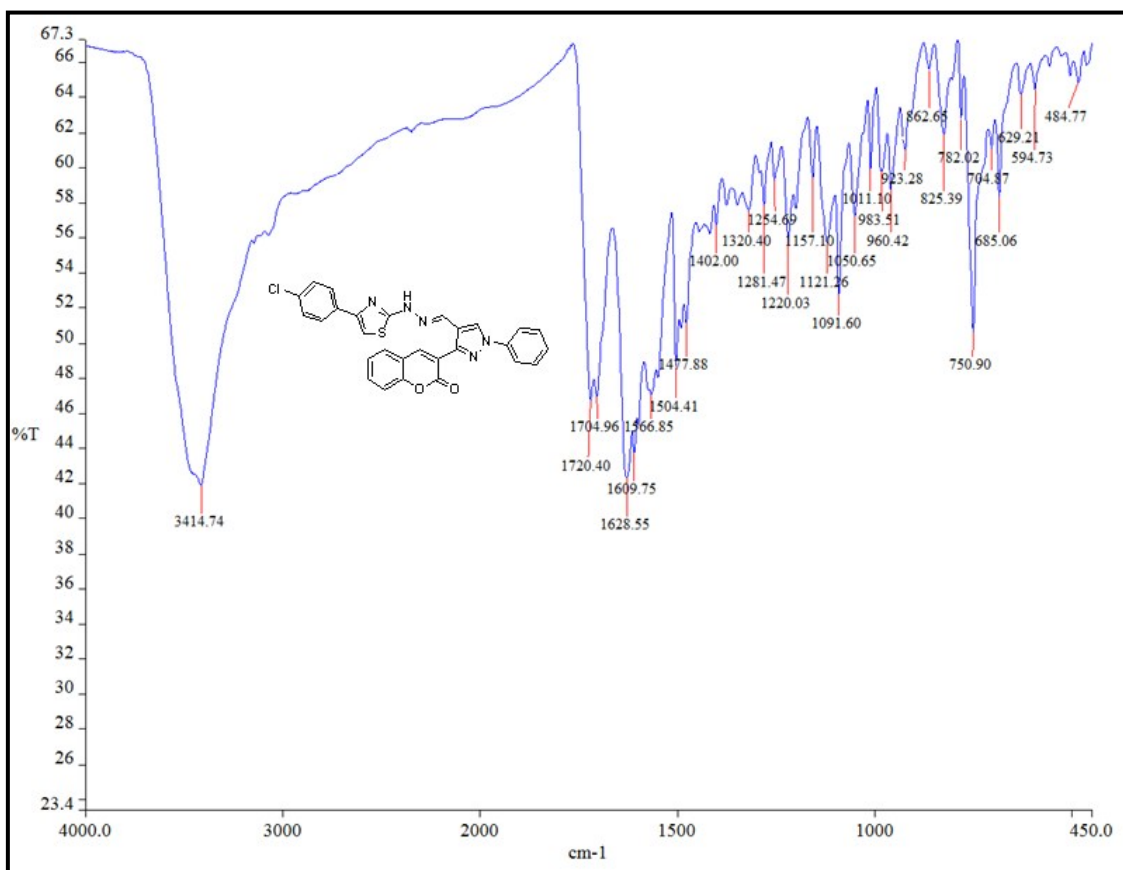

**IR (KBr) spectrum of compound 5d**

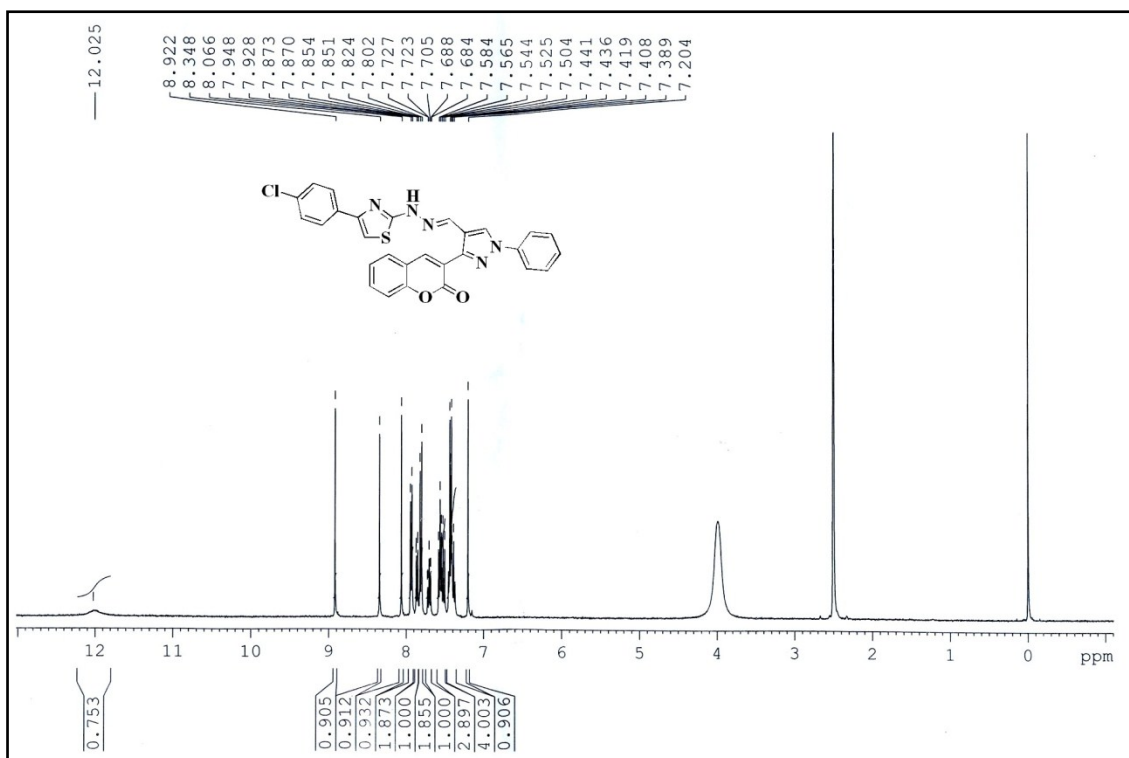

<sup>1</sup>H NMR (400 MHz, DMSO-*d*<sub>6</sub>) spectrum of compound 5d

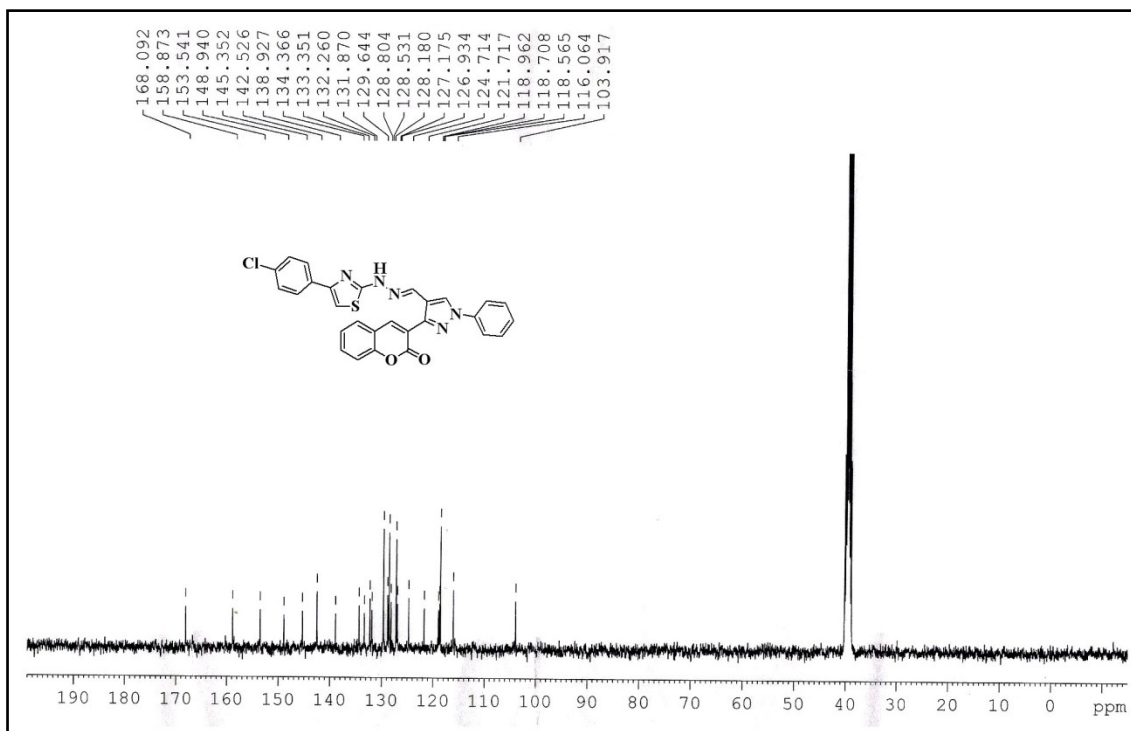

<sup>13</sup>C NMR (100 MHz, DMSO-*d*<sub>6</sub>) spectrum of compound 5d

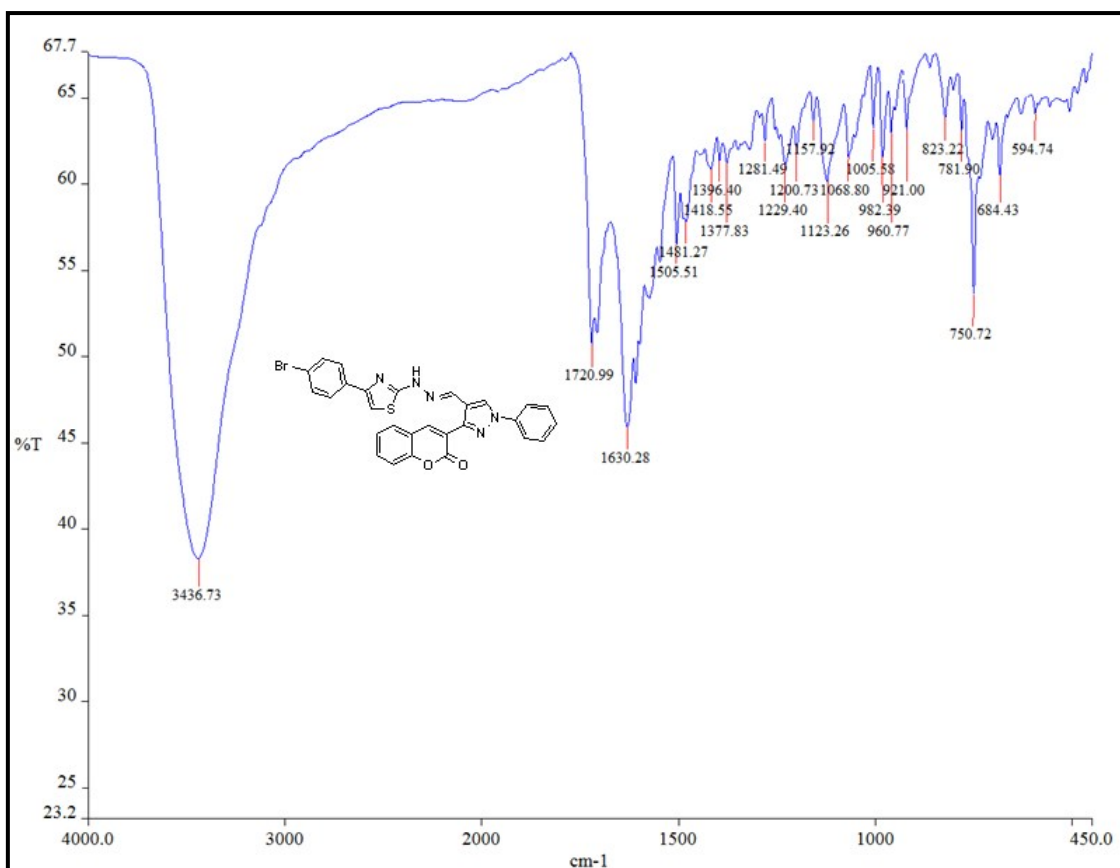

IR (KBr) spectrum of compound 5e

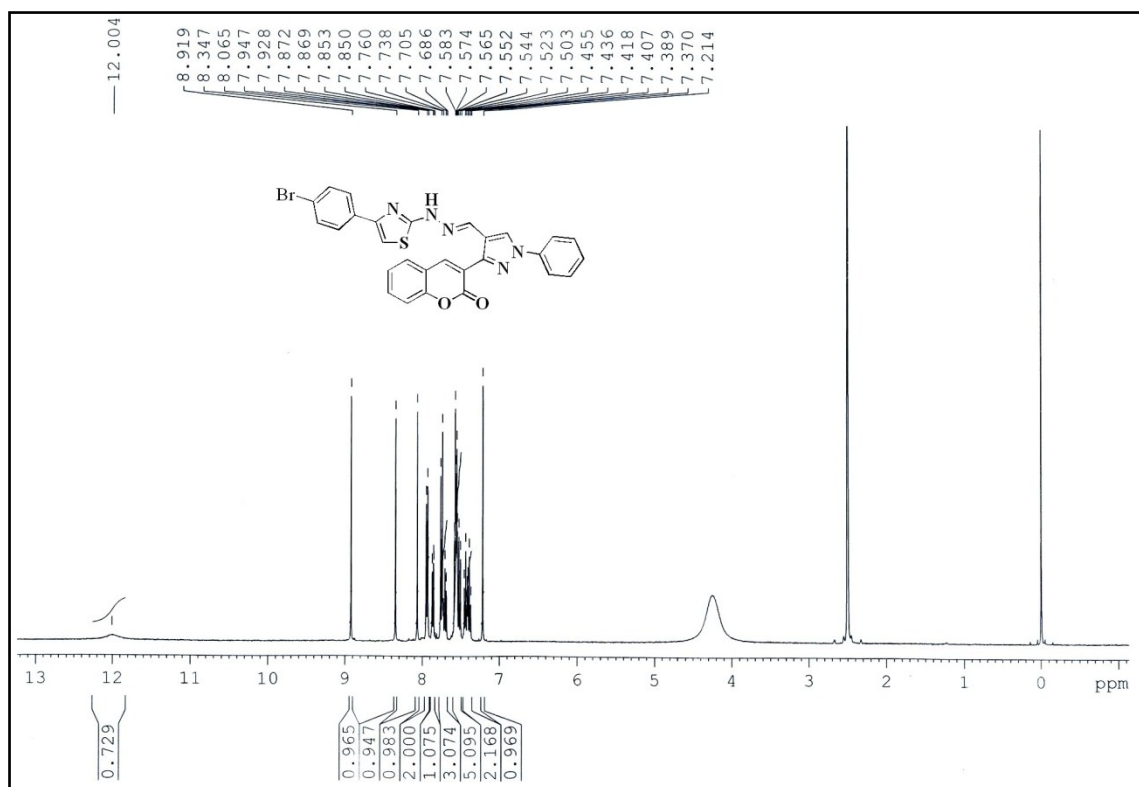

<sup>1</sup>H NMR (400 MHz, DMSO-*d*<sub>6</sub>) spectrum of compound 5e



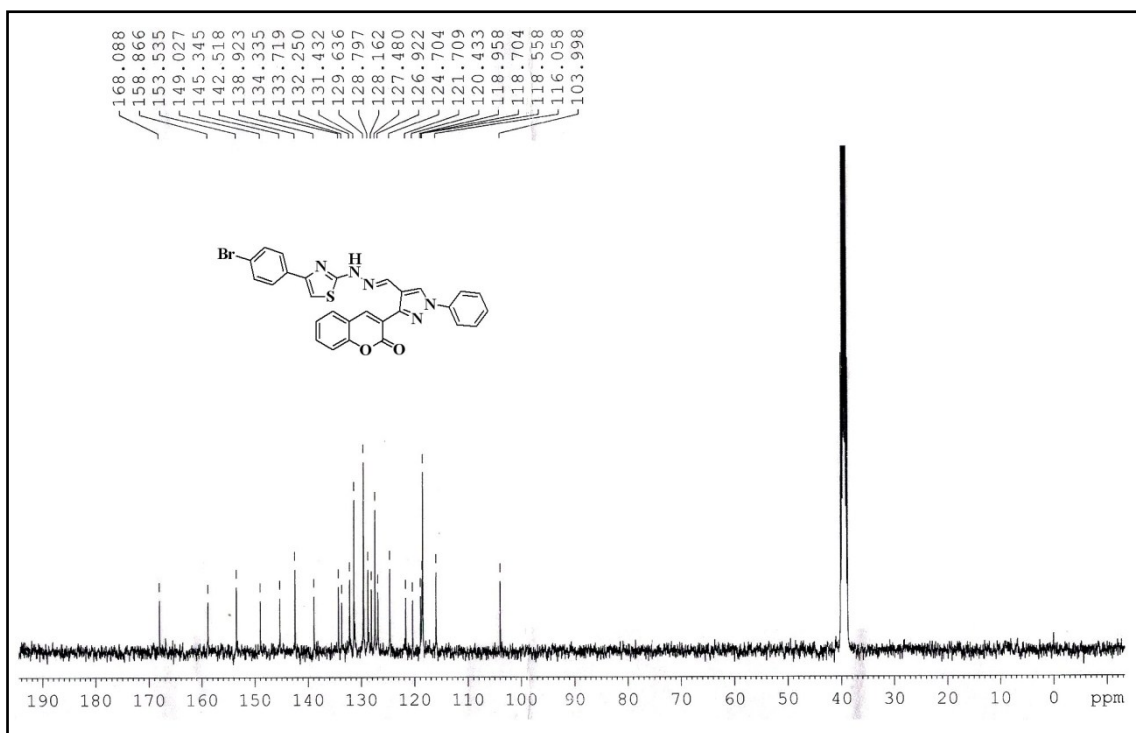

**$^{13}\text{C}$  NMR (100 MHz,  $\text{DMSO-}d_6$ ) spectrum of compound 5e**

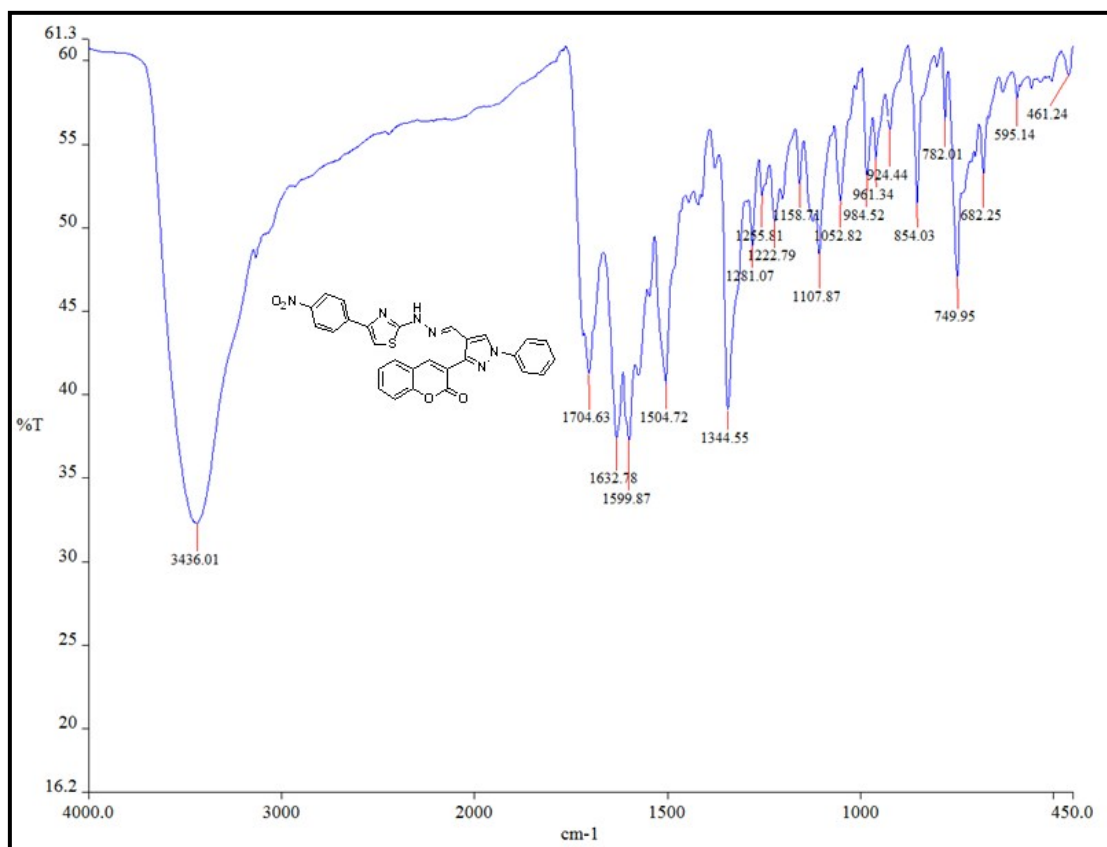

**IR (KBr) spectrum of compound 5f**

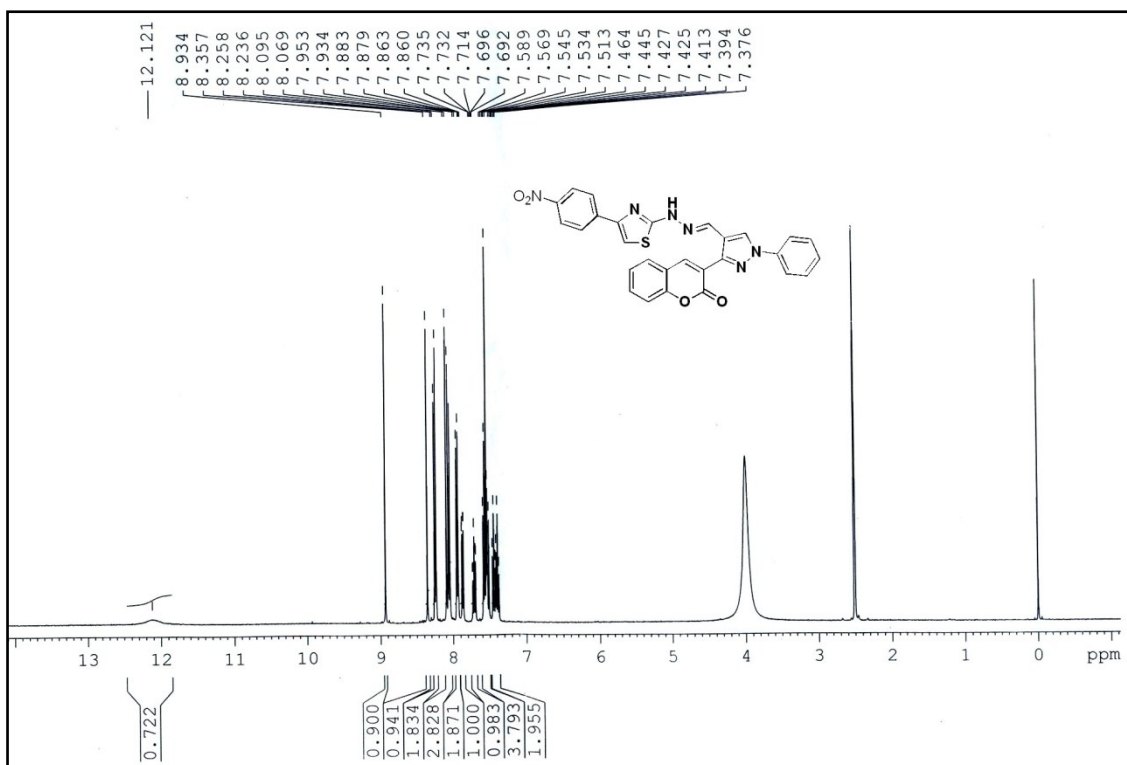

**<sup>1</sup>H NMR (400 MHz, DMSO-*d*<sub>6</sub>) spectrum of compound 5f**

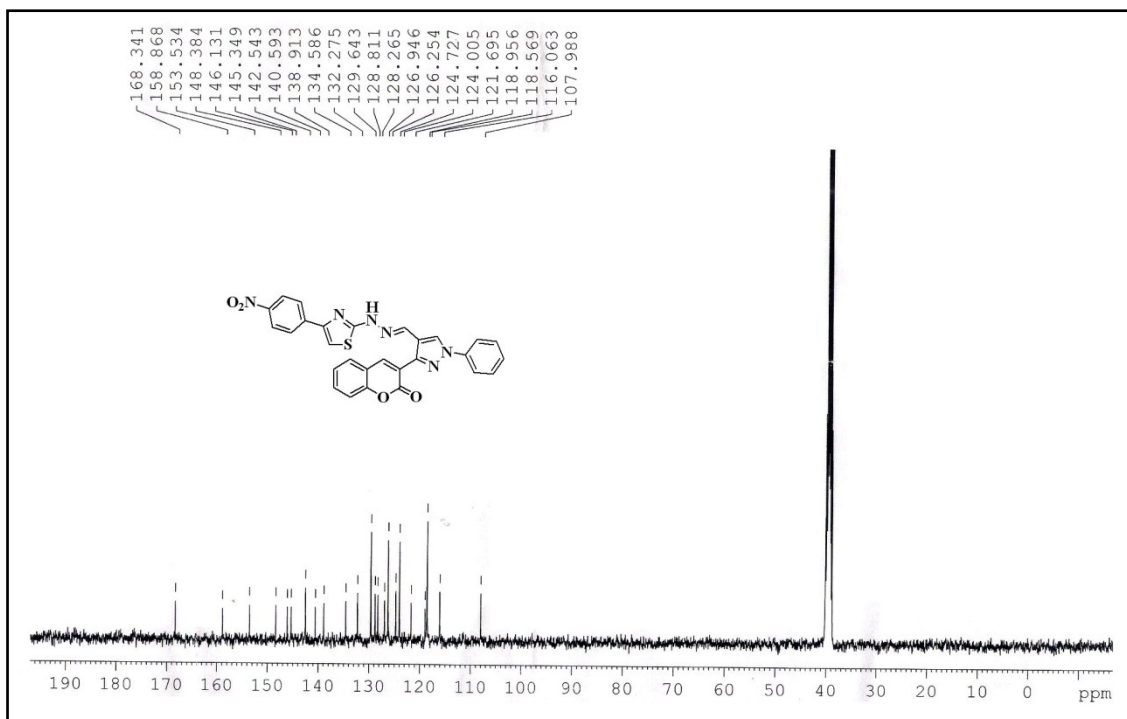

**<sup>13</sup>C NMR (100 MHz, DMSO-*d*<sub>6</sub>) spectrum of compound 5f**

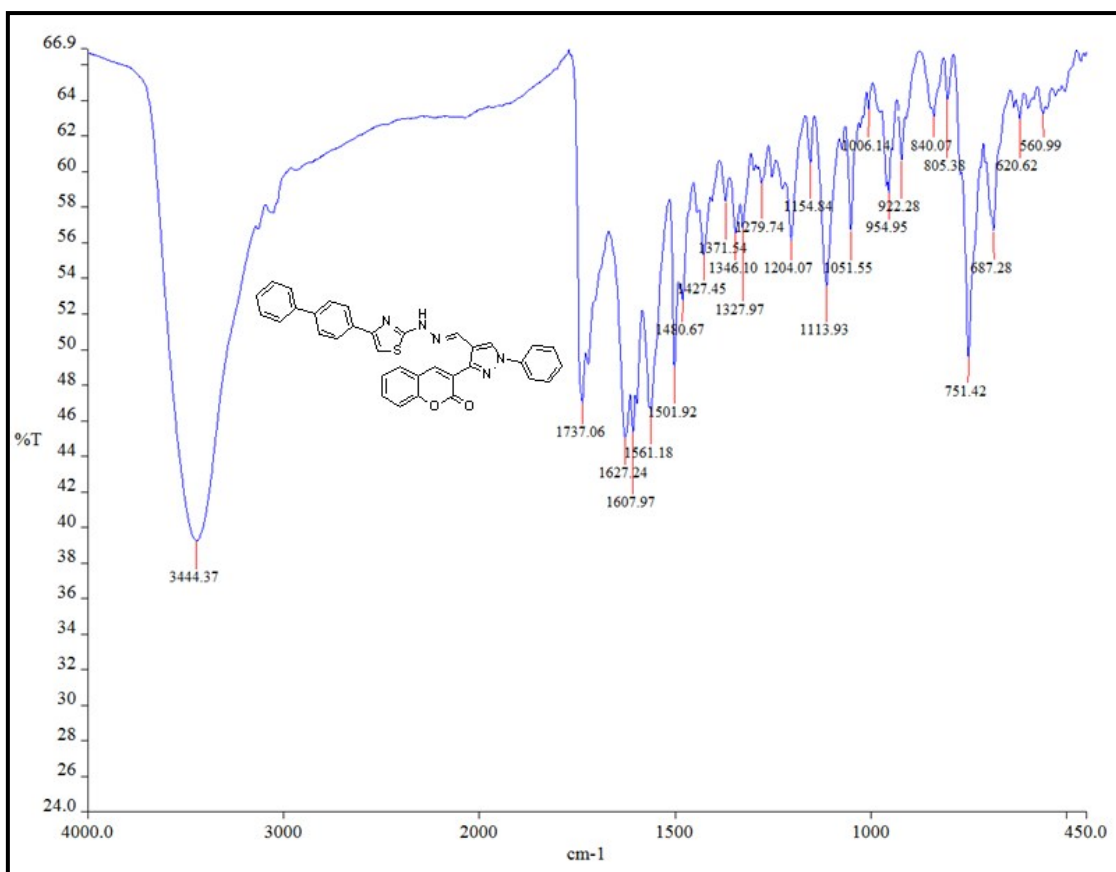

IR (KBr) spectrum of compound 5g

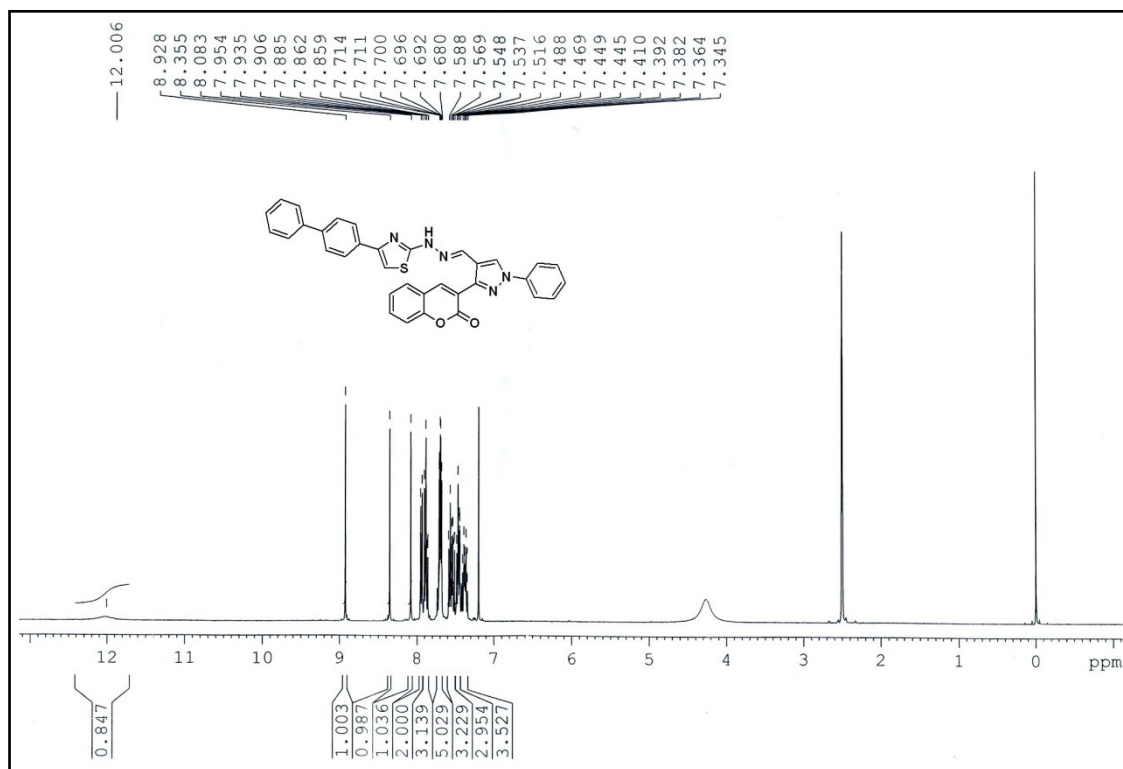

<sup>1</sup>H NMR (400 MHz, DMSO-*d*<sub>6</sub>) spectrum of compound 5g

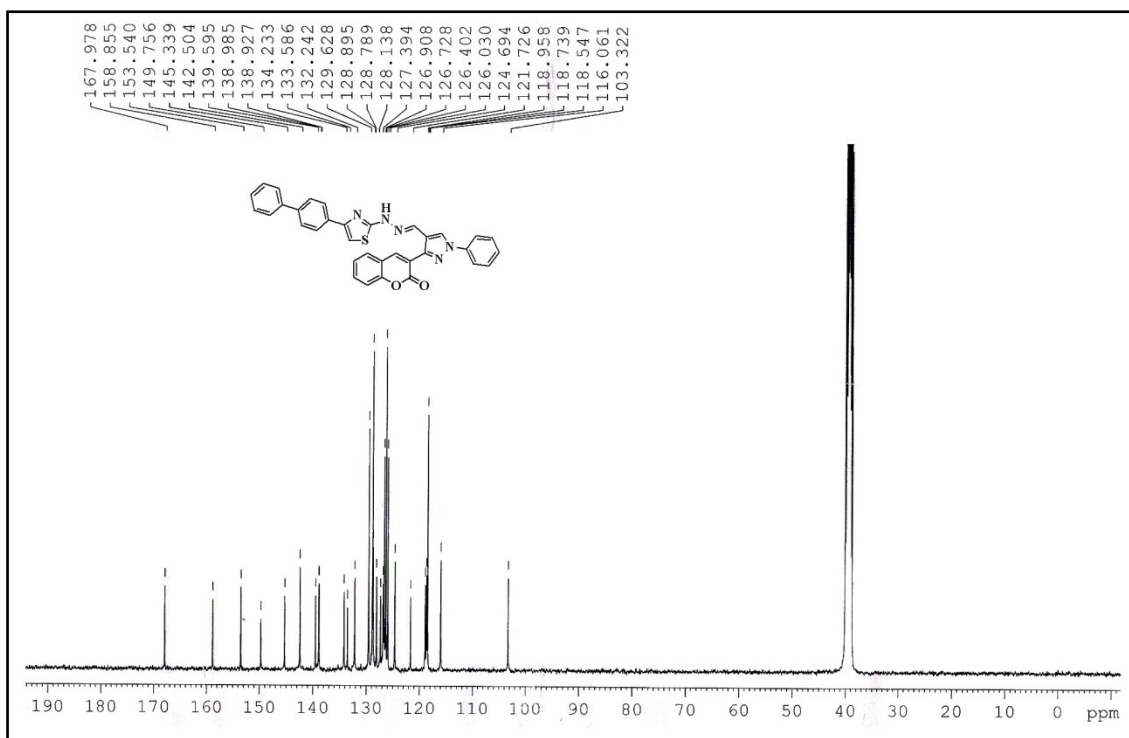

<sup>13</sup>C NMR (100 MHz, DMSO-*d*<sub>6</sub>) spectrum of compound 5g

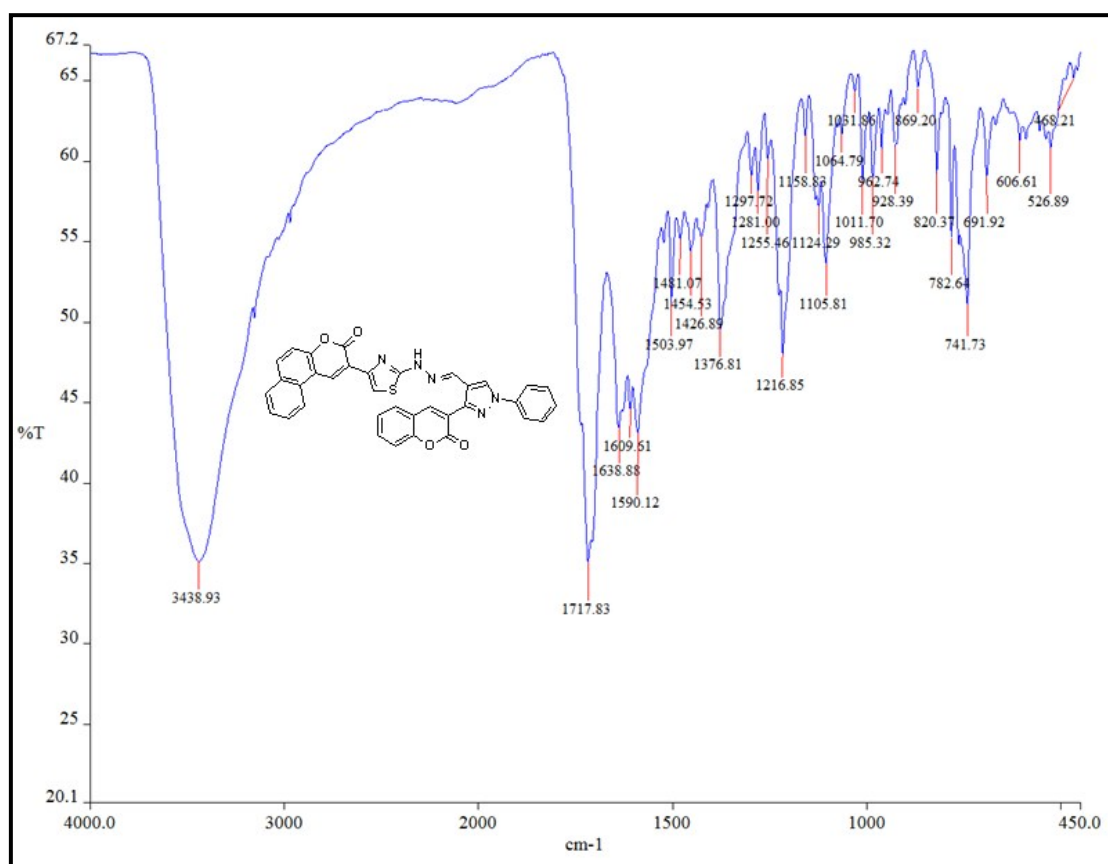

IR (KBr) spectrum of compound 5h

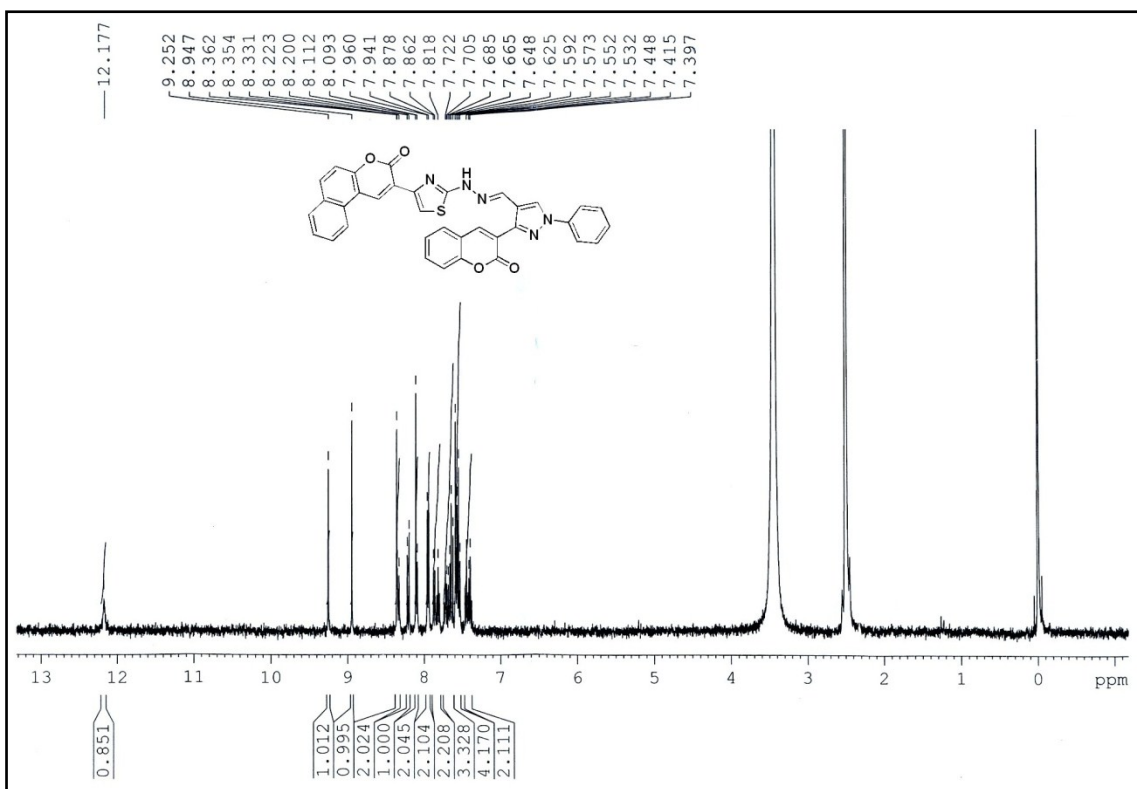

**<sup>1</sup>H NMR (400 MHz, DMSO-*d*<sub>6</sub>) spectrum of compound 5h**

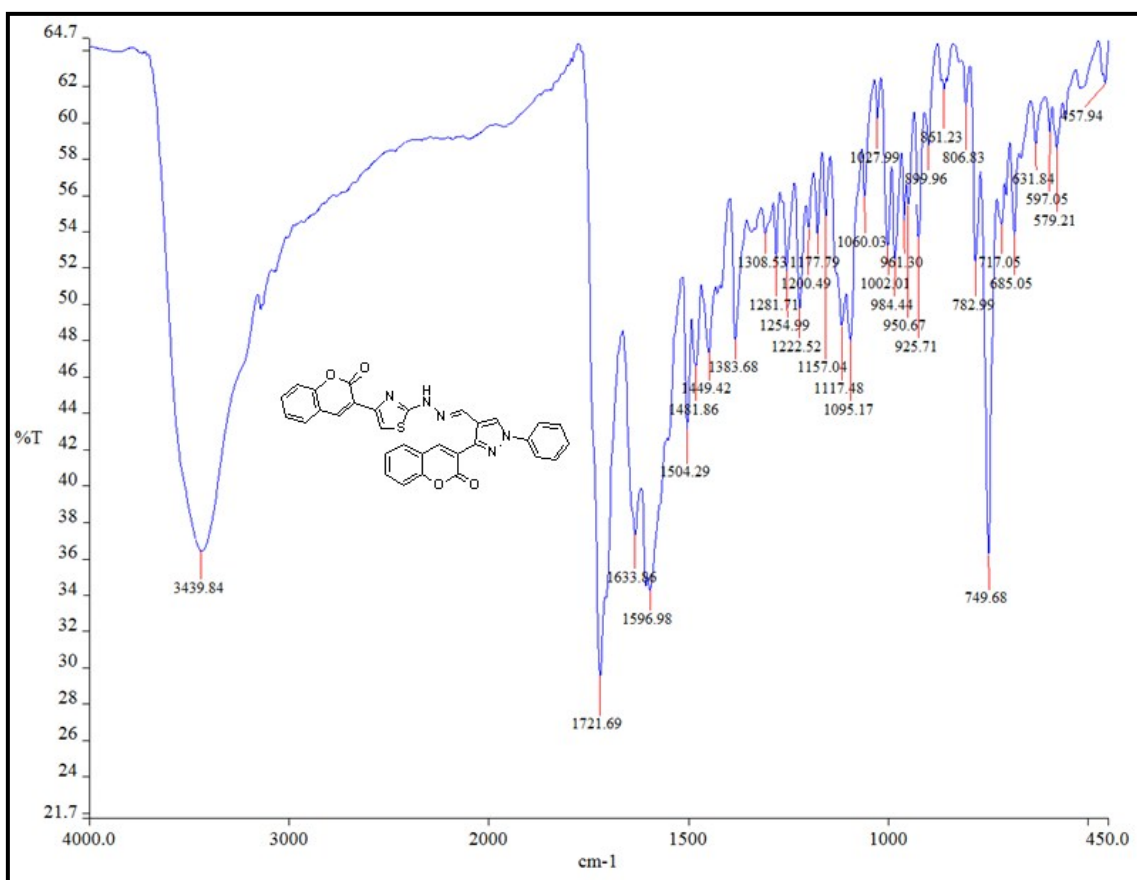

**IR (KBr) spectrum of compound 5i**

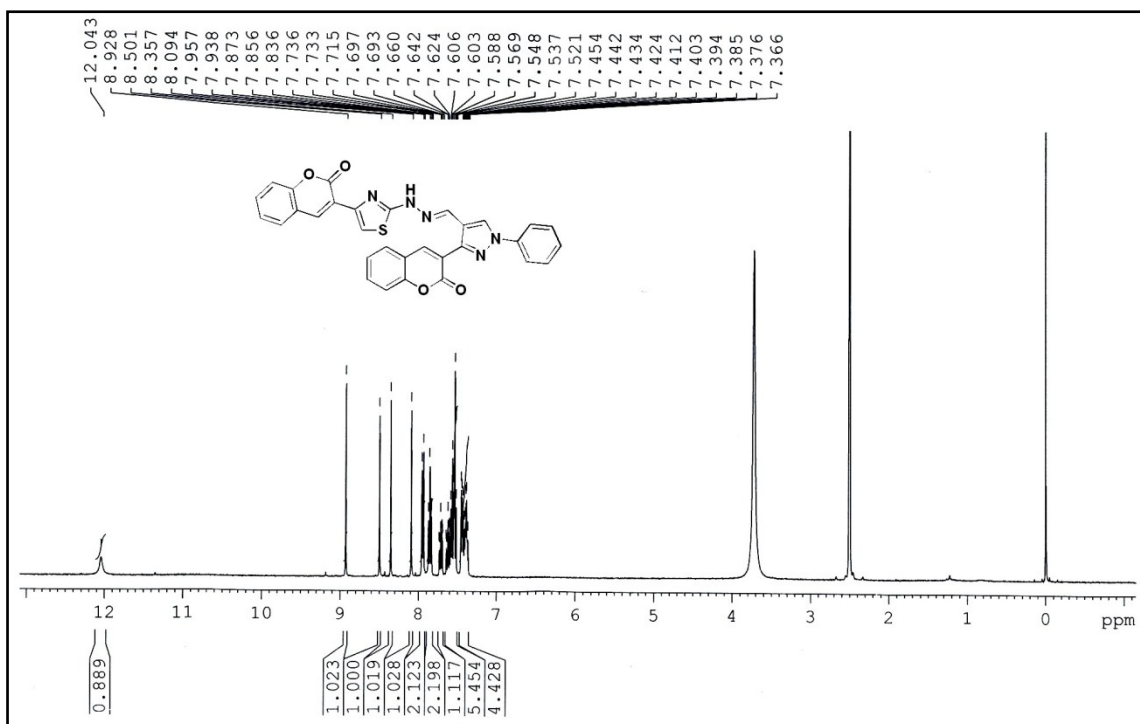

**<sup>1</sup>H NMR (400 MHz, DMSO-*d*<sub>6</sub>) spectrum of compound 5i**

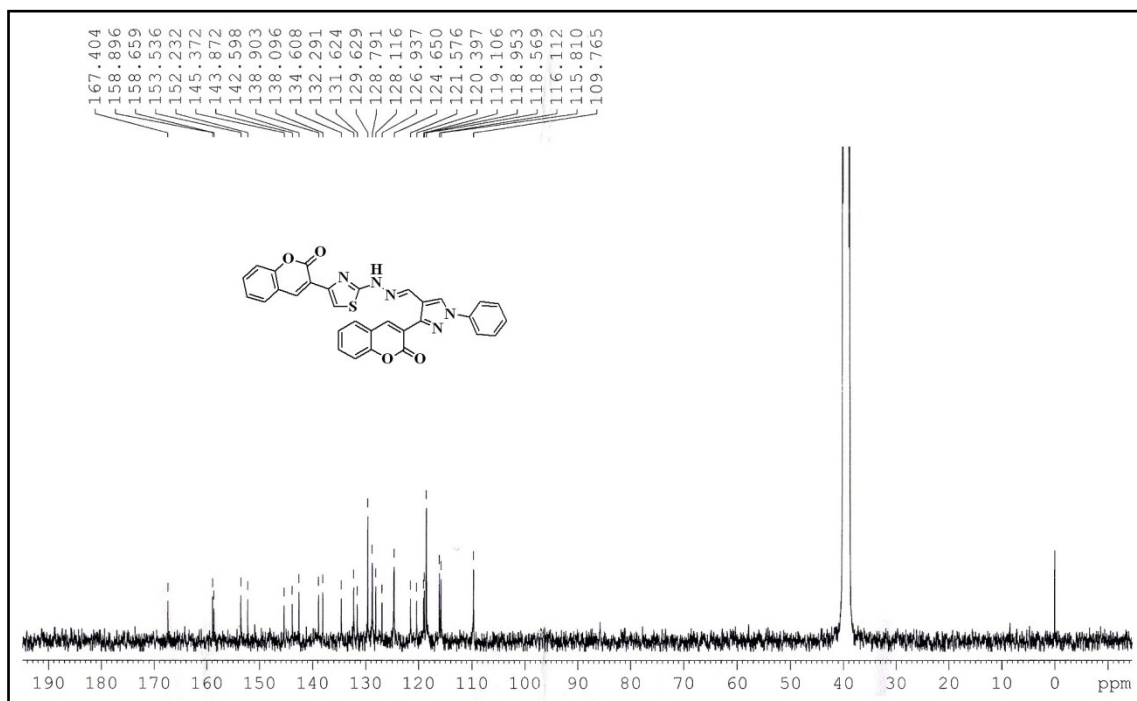

**<sup>13</sup>C NMR (100 MHz, DMSO-*d*<sub>6</sub>) spectrum of compound 5i**

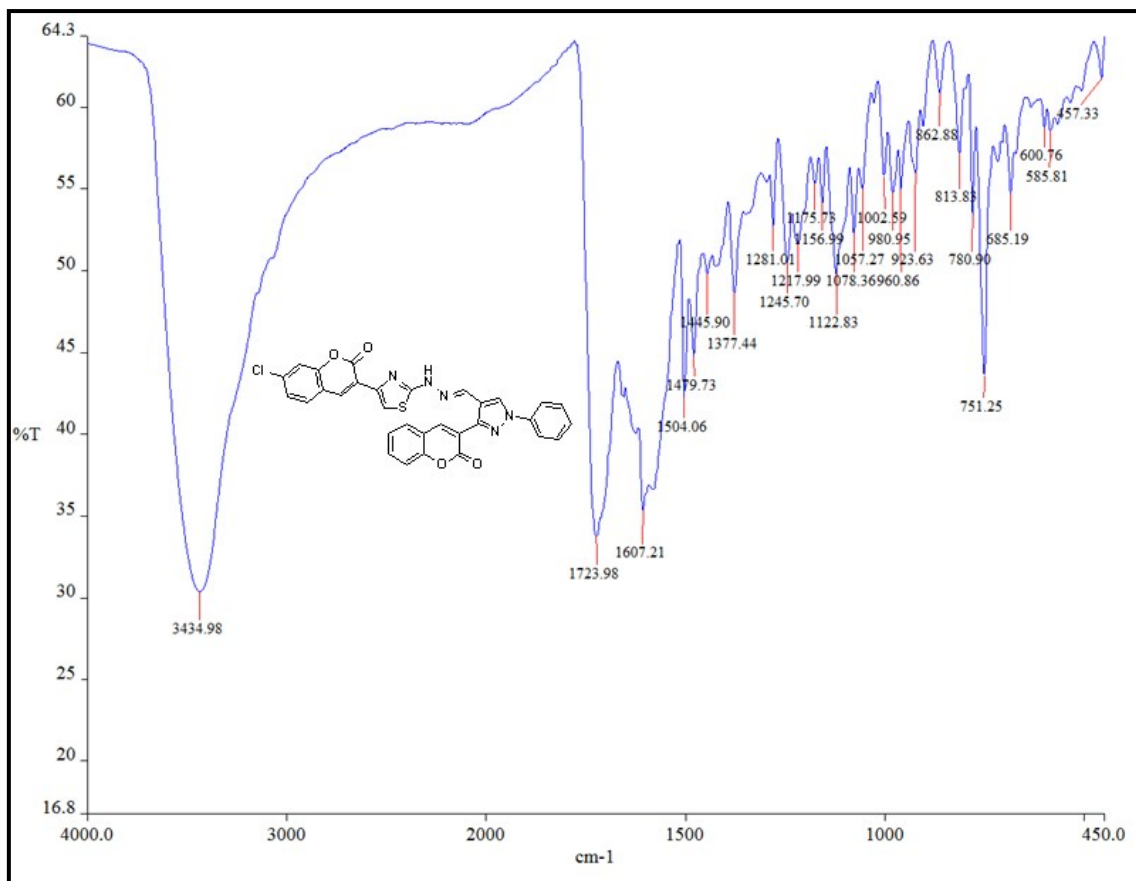

IR (KBr) spectrum of compound 5j

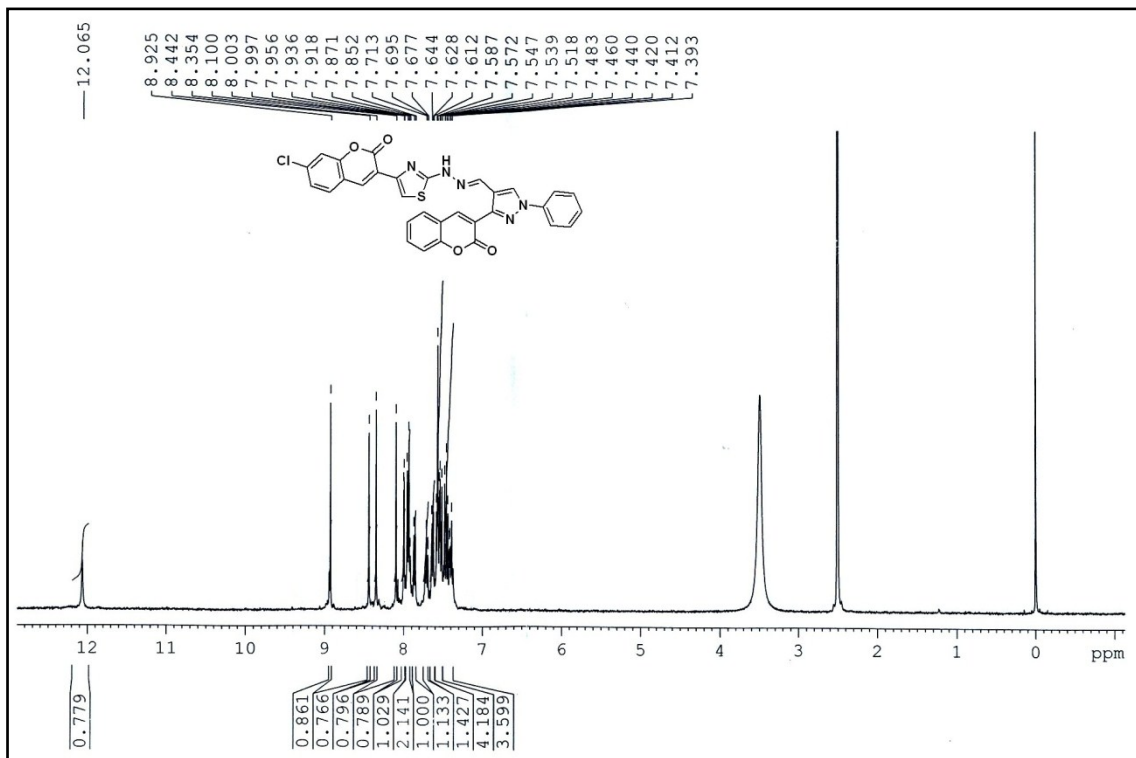

<sup>1</sup>H NMR (400 MHz, DMSO-*d*<sub>6</sub>) spectrum of compound 5j

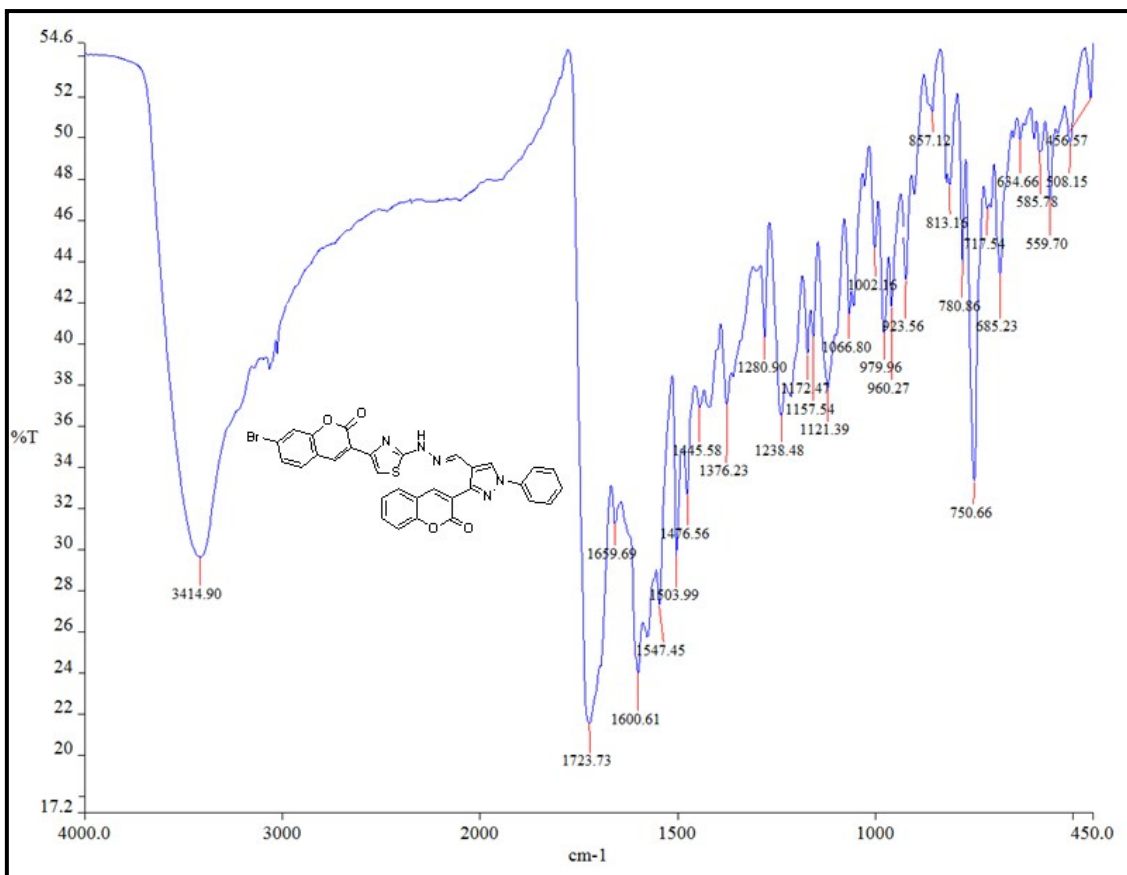

IR (KBr) spectrum of compound 5k

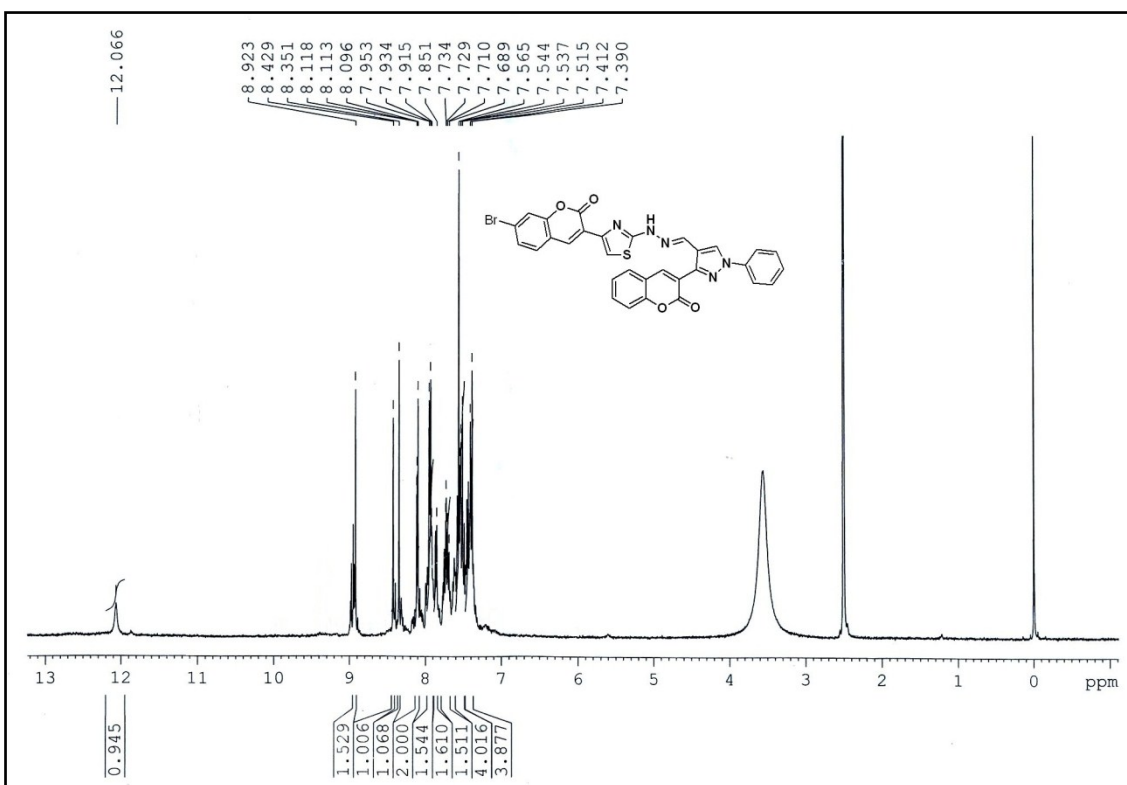

<sup>1</sup>H NMR (400 MHz, DMSO-*d*<sub>6</sub>) spectrum of compound 5k



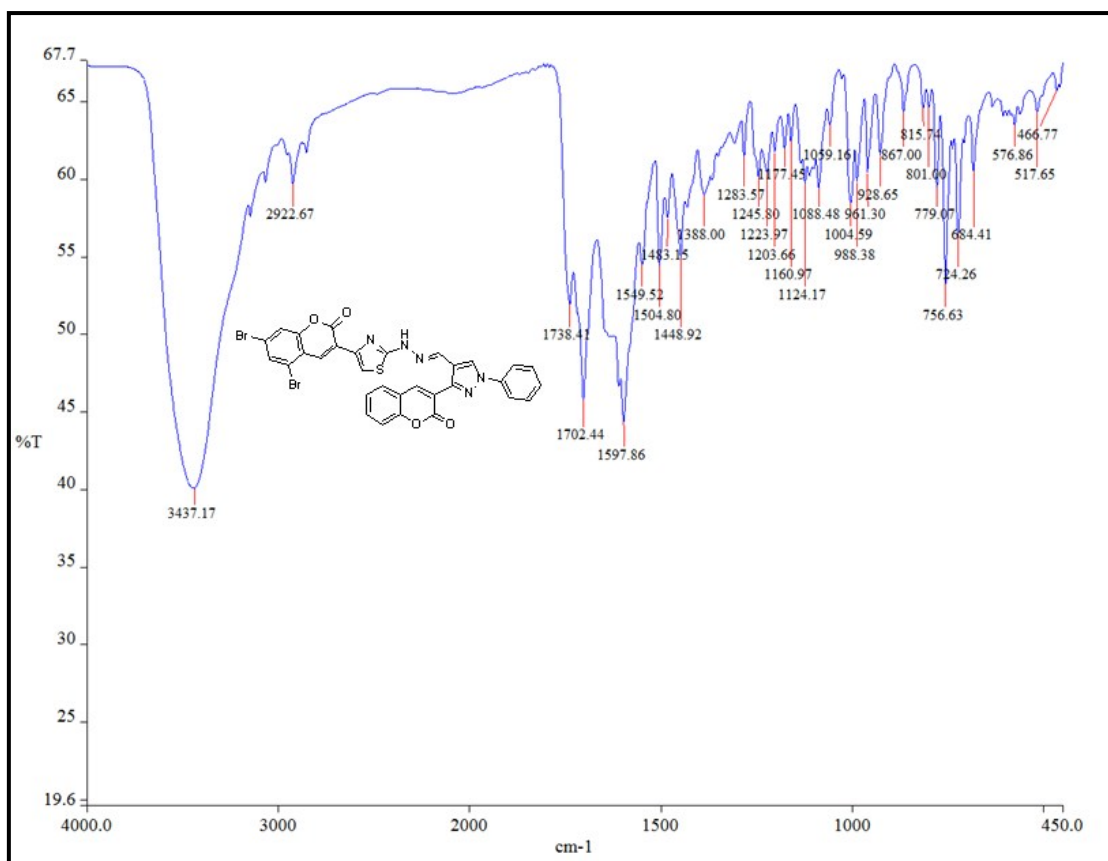

IR (KBr) spectrum of compound 51

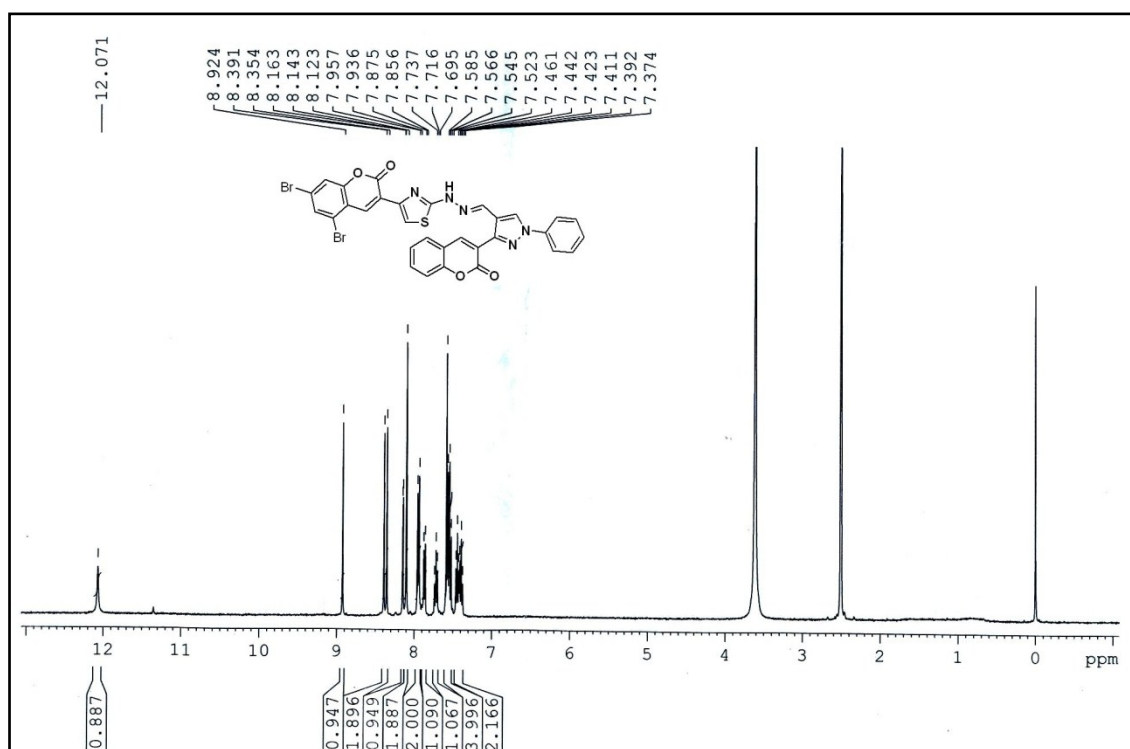

<sup>1</sup>H NMR (400 MHz, DMSO-*d*<sub>6</sub>) spectrum of compound 51

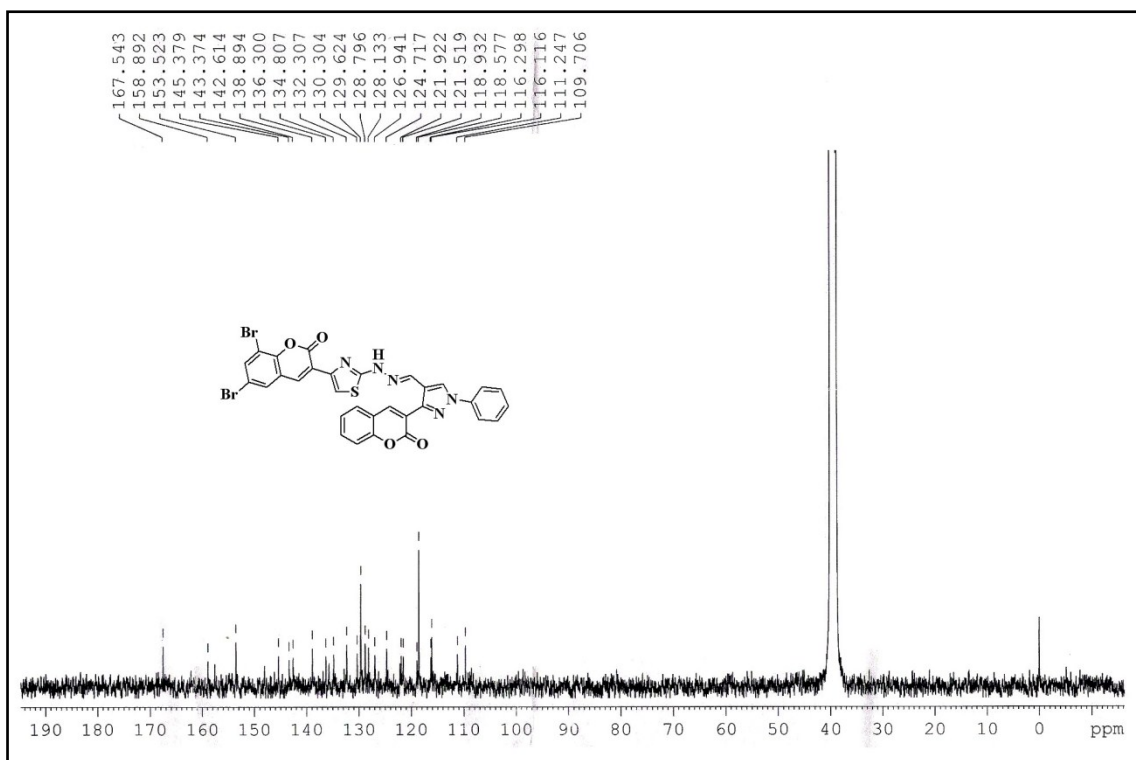

$^{13}\text{C}$  NMR (100 MHz,  $\text{DMSO-}d_6$ ) spectrum of compound 5l
